# Supplementary material for: Blood-based next-generation sequencing analysis of neuroendocrine neoplasms
Source: PubMed Central journal article supplement (PMC7233805; doi:10.18632/oncotarget.27588), 2020-05-12
Supplement: oncotarget-11-1749-s001.pdf [file oncotarget-11-1749-s001.pdf]

## Blood-based next-generation sequencing analysis of neuroendocrine neoplasms

### SUPPLEMENTARY MATERIALS

Supplemental Table 1: Correlation between mutations and chemotherapy

| Chemotherapy                                          | Number of patients treated | Histology                        | Male | Female | Genes with alterations detected                                                                                                 |
|-------------------------------------------------------|----------------------------|----------------------------------|------|--------|---------------------------------------------------------------------------------------------------------------------------------|
| Cisplatin/Irinotecan                                  | 2                          | PNET, GI NEC                     | 1/2  | 1/2    | CTNNB1, APC, AR, FGFR1, FGFR2, MYC, SMAD4, TP53                                                                                 |
| Carboplatin/Etoposide                                 | 10                         | PNET, NEC                        | 4/10 | 6/10   | KRAS, TP53, MTOR, AR, PIK3CA, MYC, NF1, CCNE1, ARID1A, CCND2, NF1, CCND1, FGFR1, VHL, RET, SMAD4, BRAF, RB1                     |
| FOLFOX                                                | 2                          | PNET                             | 1/2  | 1/2    | NTRK1, PTEN, TP53, ALK                                                                                                          |
| Chemotherapy (CBDCA + PAC...)                         | 1                          | NEC                              | 0/1  | 1/1    | ARID1A, BRAF, ERBB2, GNAS, MYC, TP53                                                                                            |
| Afinitor (Everolimus)                                 | 5                          | PNET                             | 4/5  | 1/5    | TERT, JAK2, DDR2, ERBB2, PDGFRA, SMAD4, NOTCH1, VHL, CDKN2A                                                                     |
| Octreotide                                            | 9                          | GI NEC, PNET, NEC                | 5/9  | 4/9    | APC, KRAS, RAF1, TP53, MTOR, GNA11, BRCA1, CDK6, EGFR, KIT, MET, PTEN, ARID1A, ATM, BRAF, ERBB2, FGFR2, HNF1A, MYC, NF1, NTRK3  |
| Lanreotide                                            | 4                          | PNET, NEC, GI NEC                | 0/4  | 4/4    | TP53, JAK2, GNAS, CCND2, CDKN2A, ERBB2, KRAS, MTOR                                                                              |
| AZD 1775/Olaparib                                     | 1                          | NEC                              | 0/1  | 1/1    | TP53, MET, ALK                                                                                                                  |
| Carboplatin                                           | 1                          | NEC                              | 0/1  | 1/1    | CTNNB1, TERT                                                                                                                    |
| Cisplatin/Etoposide                                   | 5                          | NEC, PNET, Lung large cell NEC   | 2/5  | 3/5    | TP53, APC, BRCA2, CCNE1, KRAS, NF1, FGFR2, MTOR, PDGFRA, EGFR, ERBB2, FGFR1, KIT                                                |
| Taxol/Carboplatin                                     | 3                          | NEC, GI NEC, Lung large cell NEC | 2/3  | 1/3    | ARID1A, BRCA2, CCNE1, EGFR, ERBB2, PIK3CA, TP53, APC, BRAF, BRCA1, CCND2, FGFR1, KRAS, MYC, PDGFRA, FGFR3, GNAS, NF1, RB1, TERT |
| S/P platinol + etoposide, S/P Keytruda, S/P Topotecan | 1                          | NEC                              | 1/1  | 0/1    | CDKN2A, RB1, TP53, EGFR, ARID1A, BRCA1, CDKN2A, FGFR2, NF1, NOTCH1                                                              |
| Gemzar/Abraxane                                       | 3                          | PNET                             | 2/3  | 1/3    | AR, KRAS, NF1, TP53, APC, GNAS, SMAD4                                                                                           |

|                              |   |   |      |     |     |                                |
|------------------------------|---|---|------|-----|-----|--------------------------------|
| Capecitabine<br>Temozolomide | + | 1 | PNET | 1/1 | 0/1 | VHL                            |
| FOLFIRINOX                   |   | 2 | PNET | 1/2 | 1/2 | NF1, TP53, ATM, KRAS,<br>SMAD4 |
| Onivyde/5FU                  |   | 1 | PNET | 0/1 | 1/1 | FGFR1, KRAS                    |

**Supplementary Table 2: Genes sequenced by Guardant360 and all four major classes of alterations**

| <b>Point Mutations (SNVs) (73 Genes)</b> | <b>Indels (23 Genes)</b> | <b>Amplifications (18 Genes)</b> | <b>Fusions (6 Genes)</b> |
|------------------------------------------|--------------------------|----------------------------------|--------------------------|
| <i>AKT1 SMO ARAF</i>                     | <i>ATM</i>               | <i>AR</i>                        | <i>ALK</i>               |
| <i>ATM APC CCND1</i>                     | <i>ARID1A</i>            | <i>CCND1</i>                     | <i>FGFR2</i>             |
| <i>CCNE1 BRCA1 CDKN2A</i>                | <i>BRCA2</i>             | <i>CCNE1</i>                     | <i>FGFR3</i>             |
| <i>DDR2 CDK4 EZH2</i>                    | <i>CDKN2A</i>            | <i>CDK6</i>                      | <i>NTRK1</i>             |
| <i>FGFR1 ERBB2 (HER2) GNA11</i>          | <i>ERBB2</i>             | <i>ERBB2</i>                     | <i>RET</i>               |
| <i>GNAS FGFR3 IDH2</i>                   | <i>KIT</i>               | <i>FGFR2</i>                     | <i>ROS1</i>              |
| <i>JAK3 HRAS MAP2K2/MEK2</i>             | <i>MLH1</i>              | <i>KRAS</i>                      |                          |
| <i>MAPK3/ERK1 KRAS MTOR</i>              | <i>NF1</i>               | <i>MYC</i>                       |                          |
| <i>NF1 MLH1 NRAS</i>                     | <i>PTEN</i>              | <i>PIK3CA</i>                    |                          |
| <i>RB1 NOTCH1 PTPN11</i>                 | <i>SMAD4</i>             | <i>BRAF</i>                      |                          |
| <i>SMAD4 PIK3CA RIT1</i>                 | <i>TP53</i>              | <i>CCND2</i>                     |                          |
| <i>VHL RHEB TP53</i>                     | <i>VHL</i>               | <i>CDK4</i>                      |                          |
| <i>ALK STK11 ARID1A</i>                  | <i>APC</i>               | <i>EGFR</i>                      |                          |
| <i>BRAF AR CCND2</i>                     | <i>BRCA1</i>             | <i>FGFR1</i>                     |                          |
| <i>CDH1 BRCA2 CTNNB1</i>                 | <i>CDH1</i>              | <i>KIT</i>                       |                          |
| <i>EGFR CDK6 FBXW7</i>                   | <i>EGFR</i>              | <i>MET</i>                       |                          |
| <i>FGFR2 ESR1 GNAQ</i>                   | <i>GATA3</i>             | <i>PDGFRA</i>                    |                          |
| <i>HNF1A GATA3 JAK2</i>                  | <i>MET</i>               | <i>RAF1</i>                      |                          |
| <i>KIT IDH1 MAPK1/ERK2</i>               | <i>MTOR</i>              |                                  |                          |
| <i>MET MAP2K1/MEK1 MYC</i>               | <i>PDGFRA</i>            |                                  |                          |
| <i>NFE2L2 MPL NTRK1</i>                  | <i>RB1</i>               |                                  |                          |
| <i>PDGFRA NPM1 RAF1</i>                  | <i>STK11</i>             |                                  |                          |
| <i>RET RHOA ROS1</i>                     | <i>TSC1</i>              |                                  |                          |
| <i>PTEN TERT SC1</i>                     |                          |                                  |                          |
| <i>NTRK3</i>                             |                          |                                  |                          |

**Supplementary Table 3: Longitudinal study of genomic alterations in repeated blood samples.** See Supplementary Table 3
